# Supplementary material
Source: PubMed Central journal article supplement (PMC2922046)
Supplement: NIHMS218719-supplement-01.pdf [file NIHMS218719-supplement-01.pdf]

**MRN:** \_\_\_\_\_ **Encounter Date:** mm / dd / yyyy **Practice ID:** 999999 **Location ID:** 001  
**Physician Name**(Last, First MI): Your Name, MD **Physician NPI:** 1111111111

**A. PATIENT DEMOGRAPHICS**

**Patient Name**(Last, First MI): \_\_\_\_\_ **SSN:** \_\_\_\_\_  **Patient new to the Practice**  
**Date of Birth:** mm / dd / yyyy **Sex:**  Male  Female **Patient Zip:** \_\_\_\_\_  
**Race: (Check all that apply)**  
 White  Black/African American  Asian  **Hispanic or Latino Ethnicity**  
 American Indian/Alaska Native  Native Hawaiian/Pacific Islander  
**Insurance Payers: (Check all that apply)** **Payer ID:** \_\_\_\_\_  
 Private Health Insurance  Medicare (fee for service)  Medicare (managed care)  Medicaid  Military Health Care  
 State Specific Plan (non-Medicaid)  Indian Health Service  Non-US Insurance  None

**B. DIAGNOSES/CONDITIONS/CO-MORBIDITIES** **Note:** Indicate if the patient has a history of any of the following.

**Coronary Artery Disease**  **Atrial Fibrillation/Flutter**  **Dyslipidemia**  **Diabetes Mellitus**  
 **Hypertension**  **Systemic Embolism**  **Peripheral Arterial Disease**  **Prior Stroke/TIA**  
 **Unstable Angina**  **Heart Failure** → (If Yes),  **New diagnosis** (within 12 months)  
 **Stable Angina** → (If Yes),  **New diagnosis** (within 12 months)

**C. CARDIAC EVENTS** **Note:** Indicate if the patient has a history of any of the following.

**Myocardial Infarction** (any history of) → (If Yes),  **Myocardial Infarction** (within 12 months)  
 **Coronary Artery Bypass Graft** (within 12 months)  **PCI - Bare Metal Stent Implant** (within 12 months)  
 **Cardiac Valve Surgery** (within 12 months)  **PCI - Drug Eluting Stent Implant** (within 12 months)  
 **Heart Transplantation** (within 12 months)  **PCI - Other (non-stent) Intervention** (within 12 months)

**D. ENCOUNTER INFORMATION** **Note:** Complete only if assessed during today's encounter. If not assessed, leave blank.

**Height:** \_\_\_\_\_ O in  cm **Blood Pressure:** \_\_\_\_\_ / \_\_\_\_\_ mmHg **Heart Rate:** \_\_\_\_\_ bpm  
**Weight:** \_\_\_\_\_ O lbs  kg  **Patient unable to be weighed**  
**Tobacco Use:**  Never  Current  Quit within past 12 months  Quit more than 12 months ago  **Patient asked, during any previous encounter in the past 24 months, about the use of Tobacco**  
→ If Current or Quit within 12 months,  Cigarettes  Cigars  Pipe  Smokeless  
→ If Current or Quit within 12 months, **Smoking Cessation Counseling:**  No  Yes  
**Advance Care Plan OR Discussion of Advance Care Plan Documented:**  No  Yes

ANGINA SYMPTOMS AND ACTIVITY ASSESSMENT(S)

**CAD** **CCS Class:**  No angina  I  II  III  IV  **Other Tool/Method Used to Assess Angina Symptoms and Activity Completed**  
 **Seattle Angina Questionnaire Completed**

HEART FAILURE ACTIVITY ASSESSMENT(S)

**HF** **NYHA Class:**  I  II  III  IV  **Chronic Heart Failure Questionnaire from Guyatt Completed**  
 **Kansas City Cardiomyopathy Questionnaire Completed**  **Other Tool/Method Used to Assess Heart Failure Activity Completed**  
 **Minnesota Living with HF Questionnaire Completed**

HEART FAILURE SYMPTOMS ASSESSMENT(S)

**HF** **Dyspnea Present:**  No  Yes **Orthopnea Present:**  No  Yes

HEART FAILURE PHYSICAL ASSESSMENT(S)

**HF** **Rales Present:**  No  Yes **Peripheral Edema Present:**  No  Yes **S<sub>3</sub> Gallop Present:**  No  Yes  
**Ascites Present:**  No  Yes **Hepatomegaly Present:**  No  Yes **S<sub>4</sub> Gallop Present:**  No  Yes  
**Jugular Venous Distention Present:**  No  Yes

PLAN OF CARE

**HTN** **Hypertension plan of care documented:**  No  Yes **Note:** Required for patients that have been diagnosed with Hypertension.

|     |                                                                                                                                                                                                                                                                                                                                               |                                                                                                                                                 |
|-----|-----------------------------------------------------------------------------------------------------------------------------------------------------------------------------------------------------------------------------------------------------------------------------------------------------------------------------------------------|-------------------------------------------------------------------------------------------------------------------------------------------------|
| CAD | <b>Cardiac Rehabilitation Referral or Plan for Qualifying Event/Diagnosis in past 12 months:</b>                                                                                                                                                                                                                                              | <b>Note:</b> Cardiac event/diagnoses includes Myocardial Infarction, Valve surgery, Heart Transplant, CABG, PCI or new Stable Angina diagnosis. |
|     | <input type="radio"/> Yes—Referral/Plan Documented <input type="radio"/> No Qualifying Event/Diagnosis <input type="radio"/> Patient Already Participating in Rehab<br><input type="radio"/> No Referral/Plan – Medical Reason <input type="radio"/> No Referral/Plan – Patient Reason <input type="radio"/> No Referral/Plan – System Reason |                                                                                                                                                 |

|    |                                                                                                                                                                                                                                                                                                                                                                                                                                                                                                               |  |                                               |
|----|---------------------------------------------------------------------------------------------------------------------------------------------------------------------------------------------------------------------------------------------------------------------------------------------------------------------------------------------------------------------------------------------------------------------------------------------------------------------------------------------------------------|--|-----------------------------------------------|
| HF | <input type="checkbox"/> <b>HF Education Completed/Documented</b>                                                                                                                                                                                                                                                                                                                                                                                                                                             |  |                                               |
|    | → If Yes, <b>HF Education</b> (Check all that apply):                                                                                                                                                                                                                                                                                                                                                                                                                                                         |  | <input type="checkbox"/> All of the following |
|    | <input type="checkbox"/> Weight Monitoring <input type="checkbox"/> Diet (Sodium Restriction) <input type="checkbox"/> Symptom Management <input type="checkbox"/> Physical Activity<br><input type="checkbox"/> Smoking Cessation <input type="checkbox"/> Medication Instruction <input type="checkbox"/> Minimizing or Avoiding use of NSAIDs <input type="checkbox"/> Prognosis/end-of-life Issues<br><input type="checkbox"/> Referral for visiting nurse or specific educational or management programs |  |                                               |

**ATRIAL FIBRILLATION/FLUTTER ASSESSMENT AND TREATMENT**

|      |                                                                                                                                                                                                                                                          |
|------|----------------------------------------------------------------------------------------------------------------------------------------------------------------------------------------------------------------------------------------------------------|
| AFib | <b>AFib/Flutter Duration:</b> <input type="radio"/> First episode detected <input type="radio"/> Chronic – paroxysmal <input type="radio"/> Chronic – persistent/permanent                                                                               |
|      | <b>AFib/Flutter Type:</b> <input type="radio"/> Non-Valvular <input type="radio"/> Valvular                                                                                                                                                              |
|      | → If Non-Valvular, <b>Etiology</b> (Check all that apply): <input type="checkbox"/> Transient/reversible cause (e.g., pneumonia, hyperthyroidism)<br><input type="checkbox"/> Cardiac surgery within past 3 months<br><input type="checkbox"/> Pregnancy |

|                                                  |                                                                                                                                                                                                                                                                                                                                                                |
|--------------------------------------------------|----------------------------------------------------------------------------------------------------------------------------------------------------------------------------------------------------------------------------------------------------------------------------------------------------------------------------------------------------------------|
| <b>All Thromboembolic Risk Factors Assessed:</b> | <input type="radio"/> Yes (All risk factors assessed) <b>Note:</b> Thromboembolic risk factors include all of the following: 1.) Prior Stroke/TIA, 2.) Age ≥75, 3.) Hypertension, 4.) Diabetes Mellitus, 5.) HF or LVSD.<br><input type="radio"/> No – Medical Reason<br><input type="radio"/> No – Patient Reason<br><input type="radio"/> No – System Reason |
|--------------------------------------------------|----------------------------------------------------------------------------------------------------------------------------------------------------------------------------------------------------------------------------------------------------------------------------------------------------------------------------------------------------------------|

**E. LABORATORY RESULTS** **Note:** Enter **most recent** lab results and/or indicate the labs ordered during this encounter.

|        |                                                         |                                                                                                                                    |        |                                                                                                                                                                                          |
|--------|---------------------------------------------------------|------------------------------------------------------------------------------------------------------------------------------------|--------|------------------------------------------------------------------------------------------------------------------------------------------------------------------------------------------|
| CAD/HF | <b>LVEF Assessed Date:</b> mm / dd / yyyy (most recent) | <b>LVEF:</b> _____ %                                                                                                               | - OR - | <b>LV Qualitative Assessment:</b>                                                                                                                                                        |
|        |                                                         | <b>Note:</b> If a LVEF range is documented, take the average, round up and refer to the <b>LVEF Status</b> ranges (right) to code. |        | <input type="radio"/> Normal: ≥ 50<br><input type="radio"/> Mildly reduced: 40 – 49<br><input type="radio"/> Moderately reduced: 26 – 39<br><input type="radio"/> Severely reduced: ≤ 25 |

|     |                                                                                                                                                                                                                                                                                                                            |                                                                                                                                                                                                                                                                                                                                                                           |
|-----|----------------------------------------------------------------------------------------------------------------------------------------------------------------------------------------------------------------------------------------------------------------------------------------------------------------------------|---------------------------------------------------------------------------------------------------------------------------------------------------------------------------------------------------------------------------------------------------------------------------------------------------------------------------------------------------------------------------|
| CAD | <b>Lipid Panel Obtained Date:</b> mm / dd / yyyy <input type="checkbox"/> Fasting<br><b>Total Cholesterol:</b> _____ mg/dL<br><b>High Density Lipoprotein (HDL):</b> _____ mg/dL<br><b>Low Density Lipoprotein (LDL):</b> _____ mg/dL<br><b>Triglycerides:</b> _____ mg/dL<br><input type="checkbox"/> Lipid Panel Ordered | <input type="checkbox"/> <b>Serum Glucose Ordered</b> (If not known Diabetic)<br><b>Glucose Date:</b> mm / dd / yyyy <b>Glucose:</b> _____ mg/dL<br><b>Glucose timing:</b> <input type="radio"/> Fasting <input type="radio"/> 2hr-post prandial<br><input type="radio"/> Random <input type="radio"/> Unknown<br><b>HbA1c Date:</b> mm / dd / yyyy <b>HbA1c:</b> _____ % |
|-----|----------------------------------------------------------------------------------------------------------------------------------------------------------------------------------------------------------------------------------------------------------------------------------------------------------------------------|---------------------------------------------------------------------------------------------------------------------------------------------------------------------------------------------------------------------------------------------------------------------------------------------------------------------------------------------------------------------------|

|    |                                                                                                                                                        |
|----|--------------------------------------------------------------------------------------------------------------------------------------------------------|
| HF | <input type="checkbox"/> <b>Initial Labs ordered for newly diagnosed Heart Failure</b> (within past 12 months) or patient new to the practice          |
|    | <b>Note:</b> Initial labs for HF include Serum Electrolytes (including Ca+ and Mg+), CBC, U/A, TSH, Liver Function tests, BUN, Creatinine and Glucose. |

**F. MEDICATIONS** **Note:** If no documentation exists as to if a medication was prescribed/continued, then leave blank.

| Medication Considerations |    |      |     |                           | Indicate prescribed/continued medications or reason not prescribed. |                       |                       |                       |                       |
|---------------------------|----|------|-----|---------------------------|---------------------------------------------------------------------|-----------------------|-----------------------|-----------------------|-----------------------|
| CAD                       | HF | AFib | HTN | Medication                | Yes (Prescribed)                                                    | No (Medical Reason)   | No (Patient Reason)   | No (System Reason)    |                       |
| √                         | √  |      | √   | ACE Inhibitor             | <input type="radio"/>                                               | <input type="radio"/> | <input type="radio"/> | <input type="radio"/> |                       |
|                           |    |      |     | ADP ANTAGONISTS           | <input type="radio"/>                                               | <input type="radio"/> | <input type="radio"/> | <input type="radio"/> |                       |
| √                         |    |      |     |                           | Clopidogrel                                                         | <input type="radio"/> | <input type="radio"/> | <input type="radio"/> | <input type="radio"/> |
|                           |    |      |     |                           | Ticlopidine                                                         | <input type="radio"/> | <input type="radio"/> | <input type="radio"/> | <input type="radio"/> |
|                           |    |      |     | Prasugrel                 | <input type="radio"/>                                               | <input type="radio"/> | <input type="radio"/> | <input type="radio"/> |                       |
| √                         |    |      |     | Aggrenox                  | <input type="radio"/>                                               | <input type="radio"/> | <input type="radio"/> | <input type="radio"/> |                       |
| √                         | √  |      | √   | ARB                       | <input type="radio"/>                                               | <input type="radio"/> | <input type="radio"/> | <input type="radio"/> |                       |
| √                         | √  | √    | √   | Aspirin                   | <input type="radio"/>                                               | <input type="radio"/> | <input type="radio"/> | <input type="radio"/> |                       |
| √                         | √  |      | √   | Beta Blocker              | <input type="radio"/>                                               | <input type="radio"/> | <input type="radio"/> | <input type="radio"/> |                       |
|                           |    |      | √   | Calcium Channel Blockers  | <input type="radio"/>                                               | <input type="radio"/> | <input type="radio"/> | <input type="radio"/> |                       |
|                           | √  |      | √   | Diuretics                 | <input type="radio"/>                                               | <input type="radio"/> | <input type="radio"/> | <input type="radio"/> |                       |
| √                         |    |      |     | Lipid Lowering Non-Statin | <input type="radio"/>                                               | <input type="radio"/> | <input type="radio"/> | <input type="radio"/> |                       |
| √                         |    |      |     | Lipid Lowering Statin     | <input type="radio"/>                                               | <input type="radio"/> | <input type="radio"/> | <input type="radio"/> |                       |
|                           |    | √    |     | Warfarin                  | <input type="radio"/>                                               | <input type="radio"/> | <input type="radio"/> | <input type="radio"/> |                       |
